# Supplementary material for: Halogen-bonded co-crystals with AIE-active α-cyanostilbenes
Source: Royal Society of Chemistry journal article supplement (doi:10.1039/d3nj00333g), 2023-01-01

## Halogen-bonded Co-Crystals with AIE active $\alpha$ -cyanostilbenes

Rahul Dahiwadkar<sup>a#</sup>, Gurudutt Dubey<sup>a#</sup>, Althaf Shaik<sup>a</sup>, Palash Jana<sup>a</sup>, Vijay Thiruvengatam<sup>b</sup>  
and Sriram Kanvah<sup>a,\*</sup>

<sup>a</sup>Department of Chemistry, Indian Institute of Technology Gandhinagar, Palaj, Gandhinagar,  
Gujarat – 382055

<sup>b</sup>Department of Biological Engineering, Indian Institute of Technology Gandhinagar, Palaj,  
Gandhinagar, Gujarat -382055

[sriram@iitgn.ac.in](mailto:sriram@iitgn.ac.in)

# The authors contributed equally

### Table of Contents

|             |                                                                                                  |
|-------------|--------------------------------------------------------------------------------------------------|
| <b>S1.</b>  | Absorption and emission data for all compounds in different solvents and binary solvent mixtures |
| <b>S2.</b>  | Emission Spectra of molar mixtures of Py with MI and DI respectively                             |
| <b>S3.</b>  | SEM Images of Py in aqueous state and in xerogel                                                 |
| <b>S4.</b>  | Lifetime decay of MI and DI in all solvents                                                      |
| <b>S5.</b>  | Photographs of single crystals under TIRF epifluorescence microscope                             |
| <b>S6.</b>  | 2D fingerprint plots                                                                             |
| <b>S7.</b>  | Simulated UV absorption spectra                                                                  |
| <b>S8.</b>  | Energy framework analysis                                                                        |
| <b>S9.</b>  | Solid state absorption spectral data of compounds                                                |
| <b>S10.</b> | Gelation methodology                                                                             |
| <b>S11.</b> | Rheology data                                                                                    |
| <b>S12.</b> | Synthetic strategy and characterization data                                                     |
| <b>S13.</b> | Characterization Details                                                                         |
| <b>S14.</b> | Spectral copies ( <sup>1</sup> H, <sup>13</sup> C & Mass Spectra)                                |

## S1: Absorption and Emission

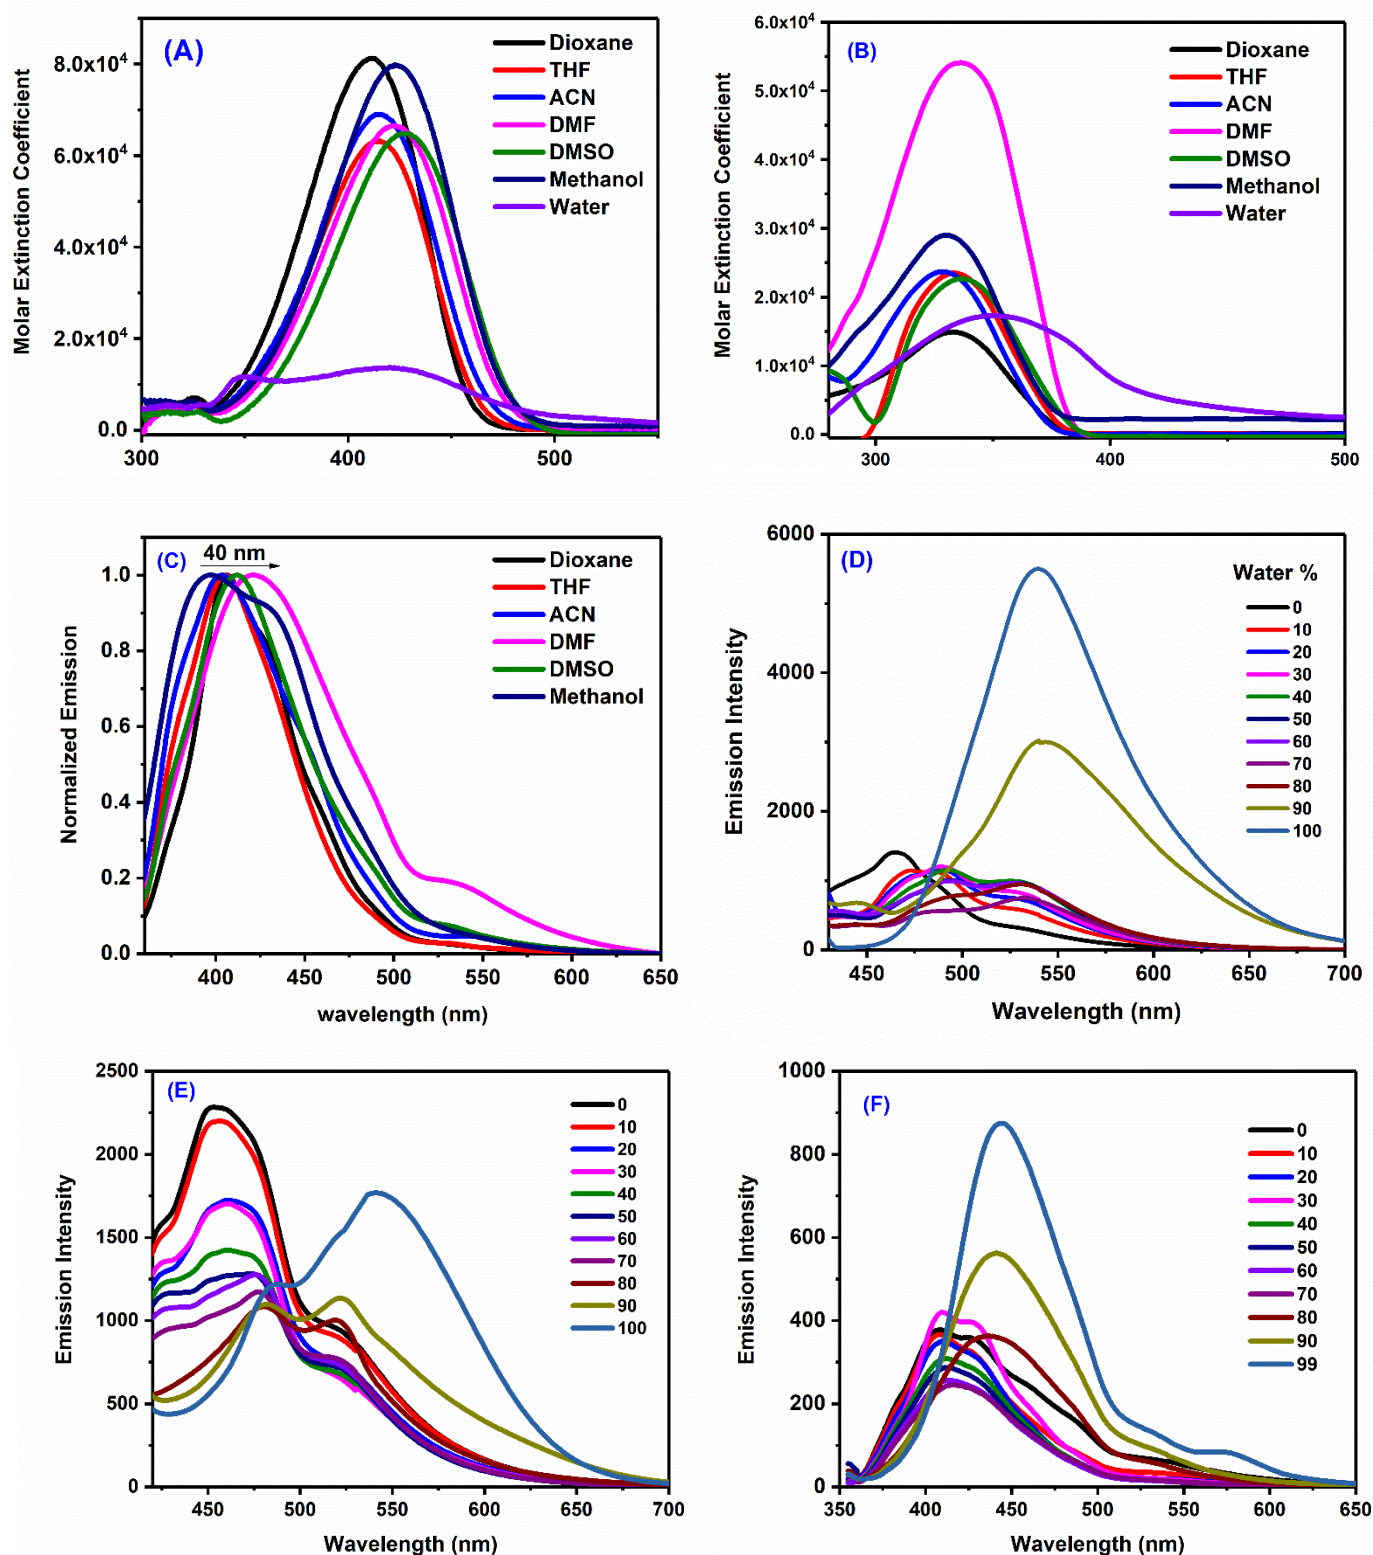

Figure S1: A) & B) Absorption spectra of Py and DI in all solvents. C) Emission spectra of DI in all solvents (excitation wavelength used is the absorption maxima). D), E) & F) Emission spectra of Py, MI, and DI in water/dioxane binary solvent mixtures revealing enhanced emission in water. Concentration [10 μM].

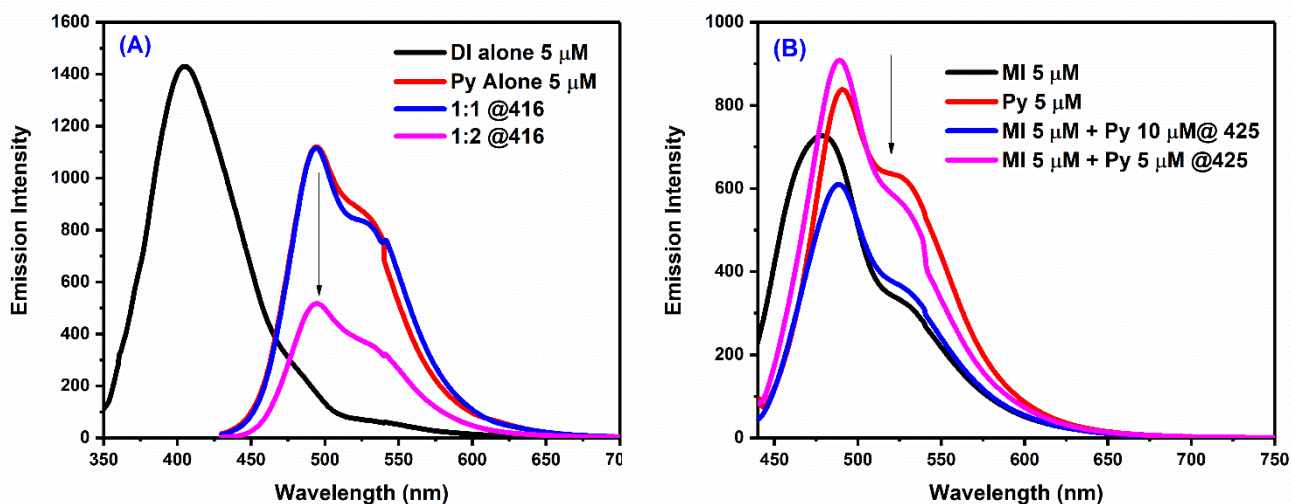

Figure S2: A) Emission spectra of DI and Py in different molar equivalents. B) Emission spectra of MI and Py in different molar mixtures

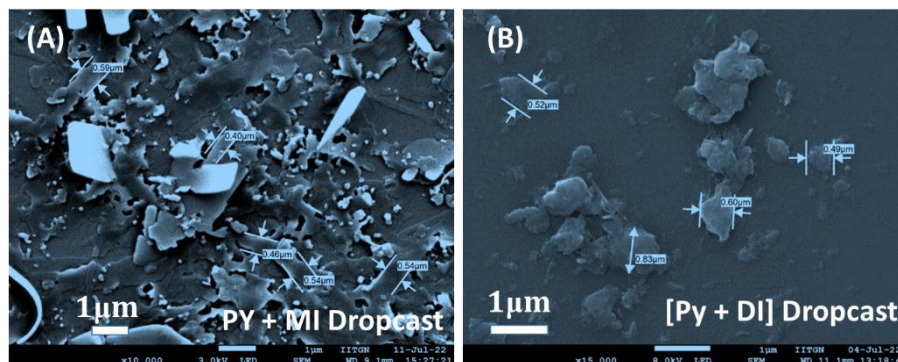

Figure S3: A) Drop-cast SEM images of molar mixtures of solution in water of Py-MI (5 $\mu\text{M}$ :5  $\mu\text{M}$ ) and B) Py-DI (10 $\mu\text{M}$ :5  $\mu\text{M}$ ) respectively.

| <b>Table S1: Lifetime Data for Py, MI and DI in dioxane and water</b> |         |                  |      |                  |       |                  |     |                                        |          |
|-----------------------------------------------------------------------|---------|------------------|------|------------------|-------|------------------|-----|----------------------------------------|----------|
| Components                                                            |         | $\tau_1$<br>(ns) | A1   | $\tau_2$<br>(ns) | A2    | $\tau_3$<br>(ns) | A3  | Average<br>Lifetime<br>( $\tau$ ) (ns) | $\chi^2$ |
| Py                                                                    | Dioxane | -                | -    | -                | -     | -                | -   | -                                      | -        |
|                                                                       | Water   | 2.19             | 22%  | 8.64             | 22%   | 0.11.            | 56% | <b>2.44</b>                            | 1.13     |
| MI                                                                    | Dioxane | 0.0016           | 100% | 0.96             | 0.12% | -                | -   | 0.0016                                 | 1.24     |
|                                                                       | Water   | 0.064            | 79%  | 0.35             | 21%   | -                | -   | <b>0.12</b>                            | 1.12     |
| DI                                                                    | Dioxane | -                | 100% | 0.86             | 0.0%  | -                | -   | -                                      | 0.98     |
|                                                                       | Water   | 0.058            | 46%  | 0.20             | 54%   | -                | -   | <b>0.13</b>                            | 1.00     |

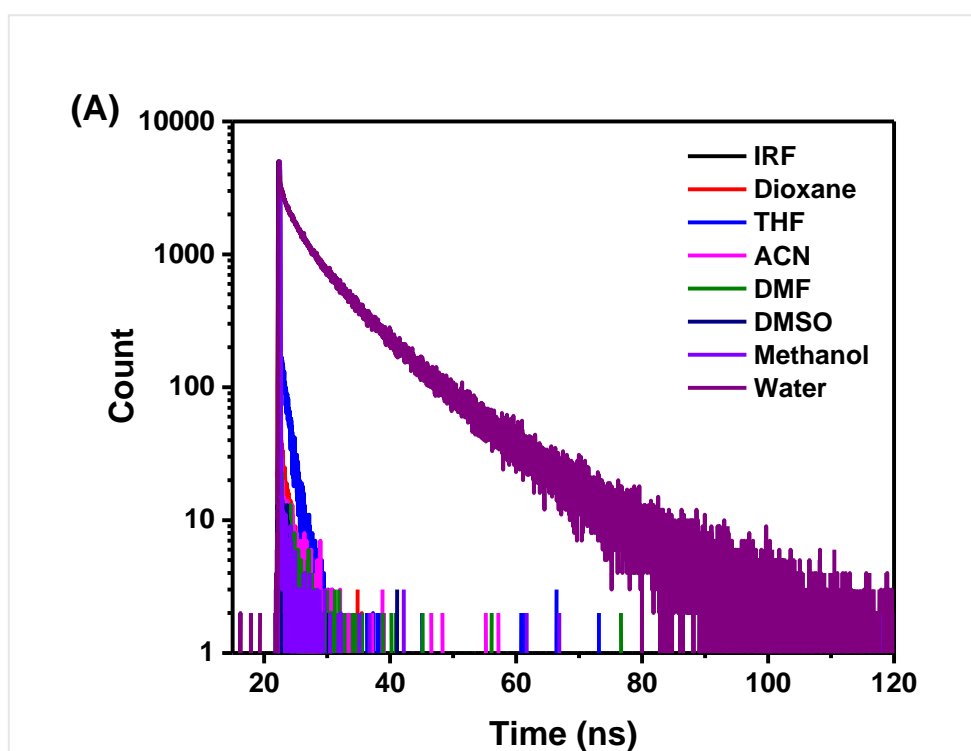

Figure S4a: Lifetime decay of Py in all solvents

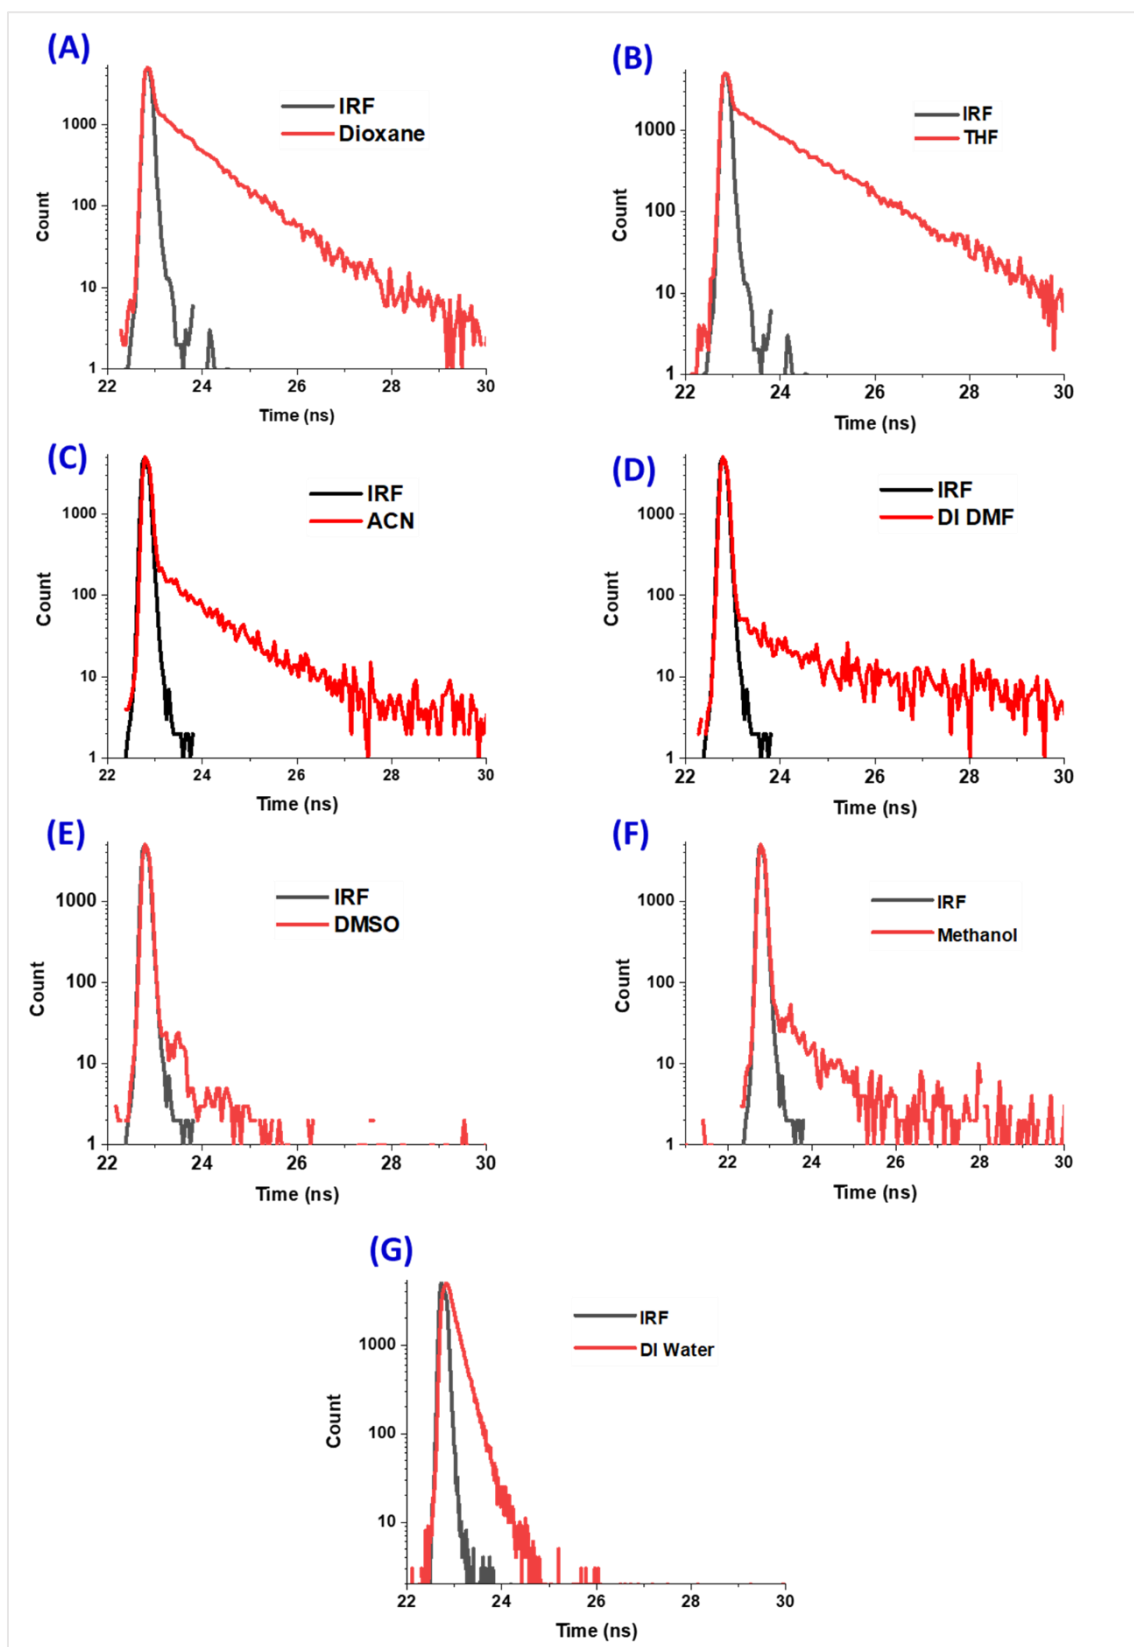

Figure S4b: Lifetime decay of DI in all solvents

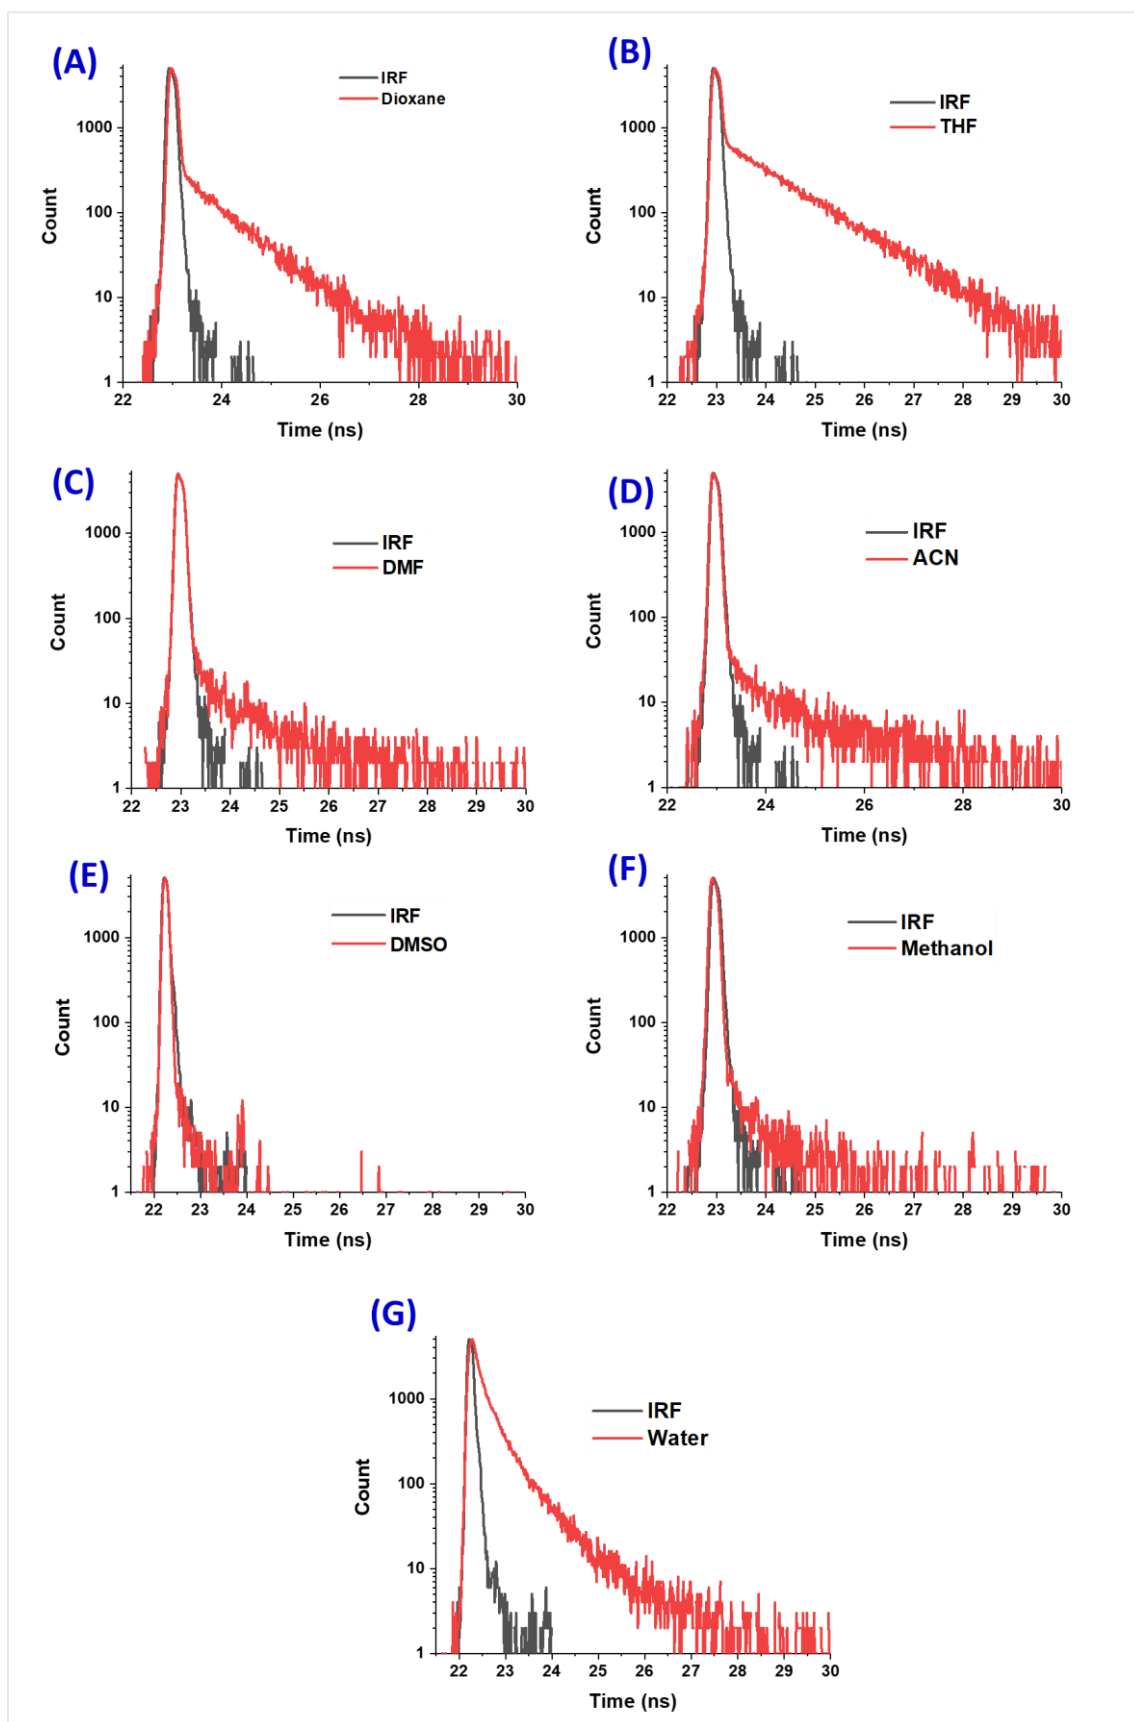

Figure S4c: Lifetime decay of MI in all solvents

## S5: Microscopic Images of Single Crystal Under Nikon – TIRF Microscope

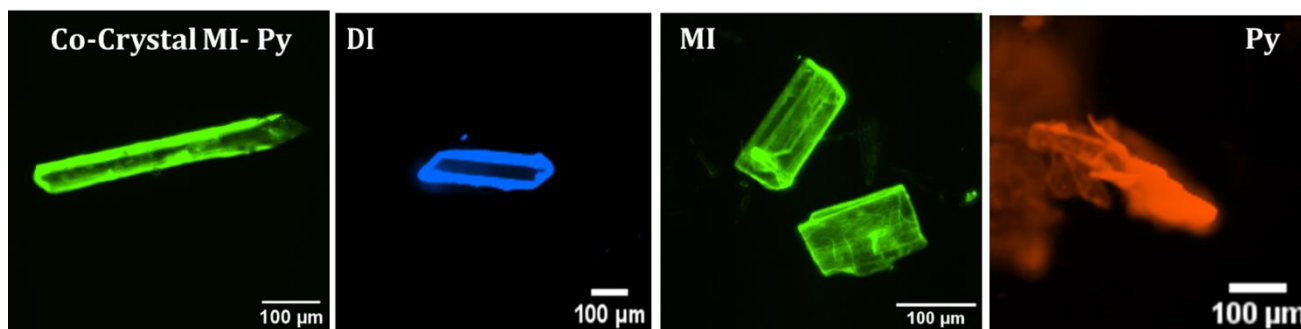

Figure S5: Images of single crystals of co-crystal Py-MI, DI, MI, and Py, respectively under a TIRF microscope (exciting at 515nm for co-crystal Py-MI, MI and Py and 350nm for DI).

## S6: 2D Fingerprint Plots highlighting interactions.

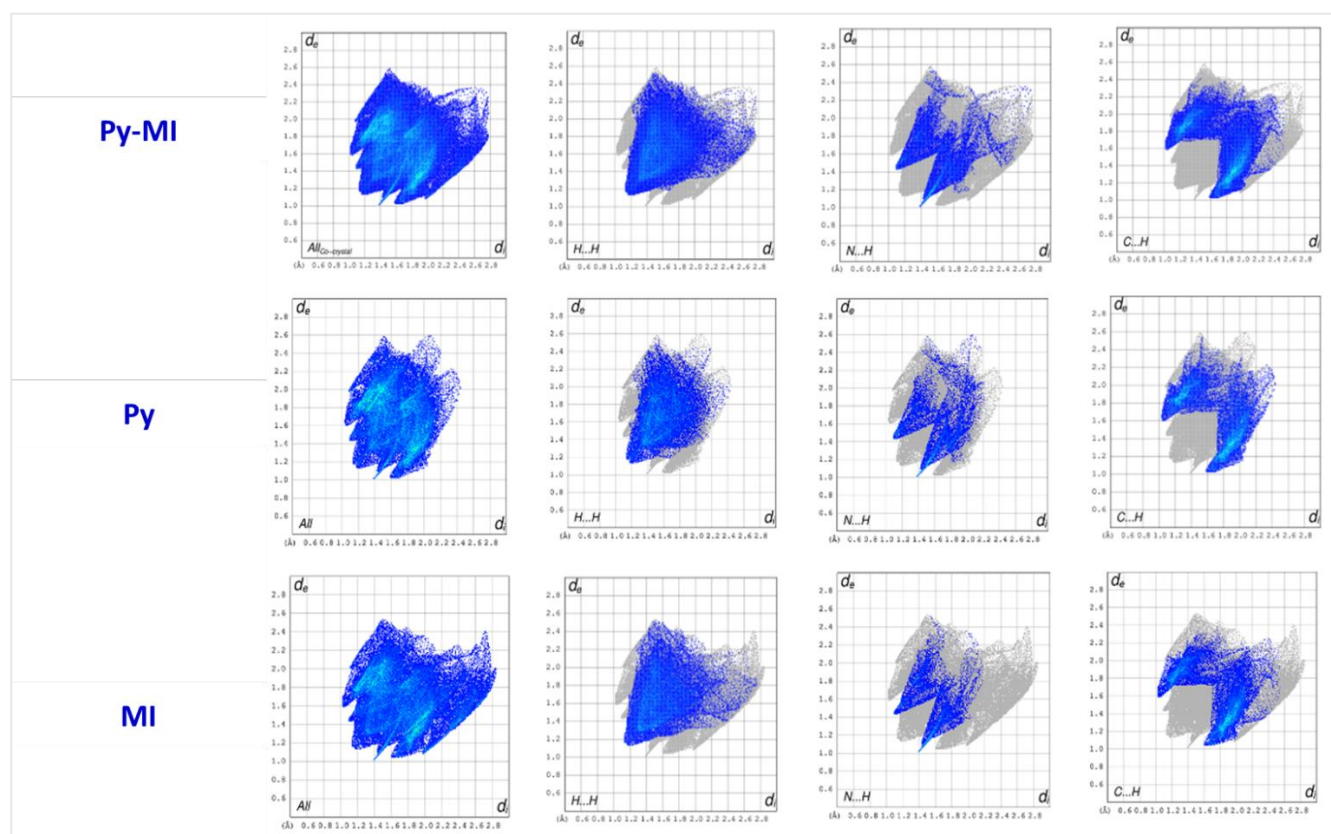

Figure S6: 2D fingerprint plots of MI, Py, Py-MI in co-crystal. Highlighting H $\cdots$ H, N $\cdots$ H and C $\cdots$ H interactions.

## S7: Simulated UV absorption Spectra

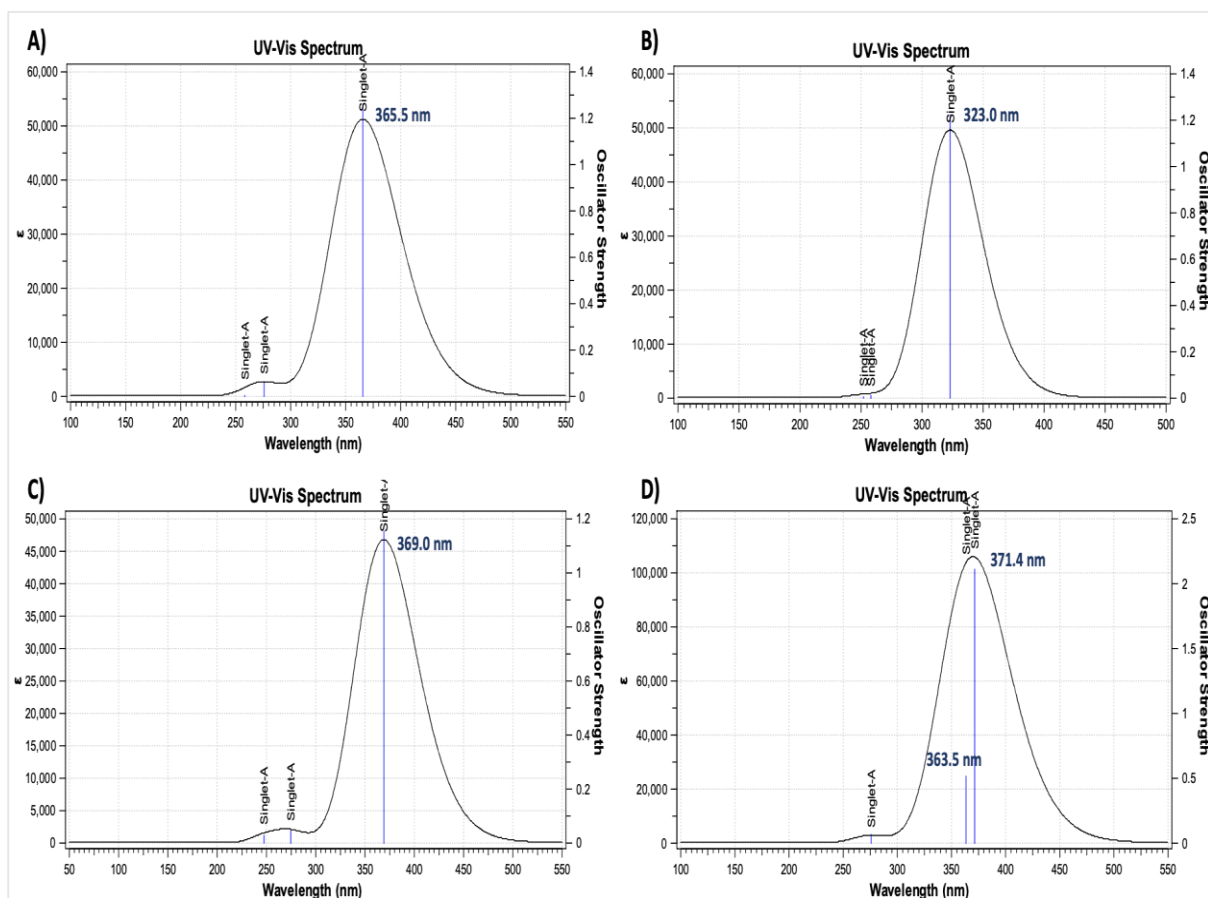

Figure S7: Simulated UV absorption spectra of MI (A), DI (B), Py (C) and Py-MI (D) obtained using at CAM-B3LYP method.



### S8: Energy Framework Analysis:

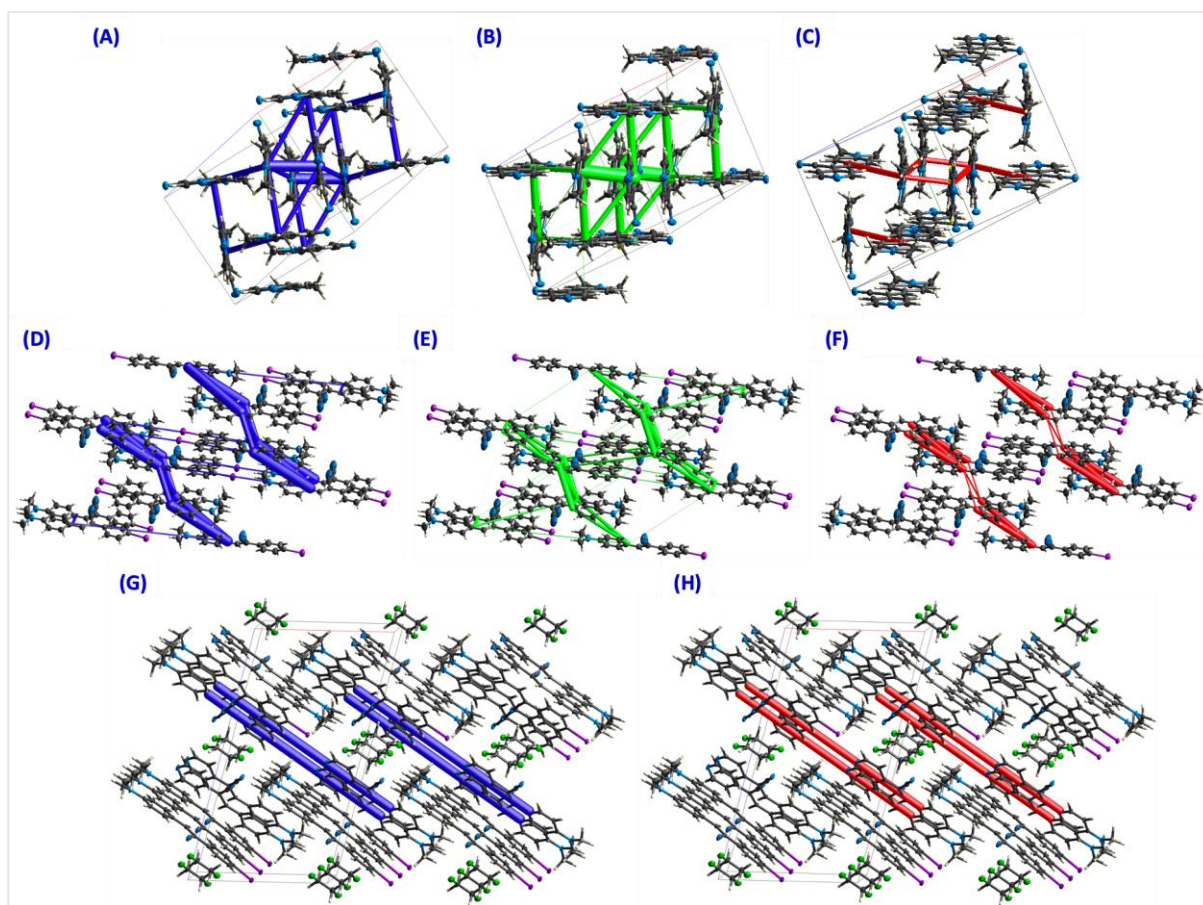

Figure S8: Energy framework analysis: (A) total energy component of Py, (B) Coulomb energy component of Py, (C) dispersion energy component of Py, (D) total energy component of MI, (E) Coulomb energy component of MI, (F) dispersion energy component of MI, (G) total energy component of Py-MI cocrystal, and (H) Coulomb energy component of Py-MI. The thickness of tubes is proportional to the interaction energy

### S9: Solid state absorption spectra:

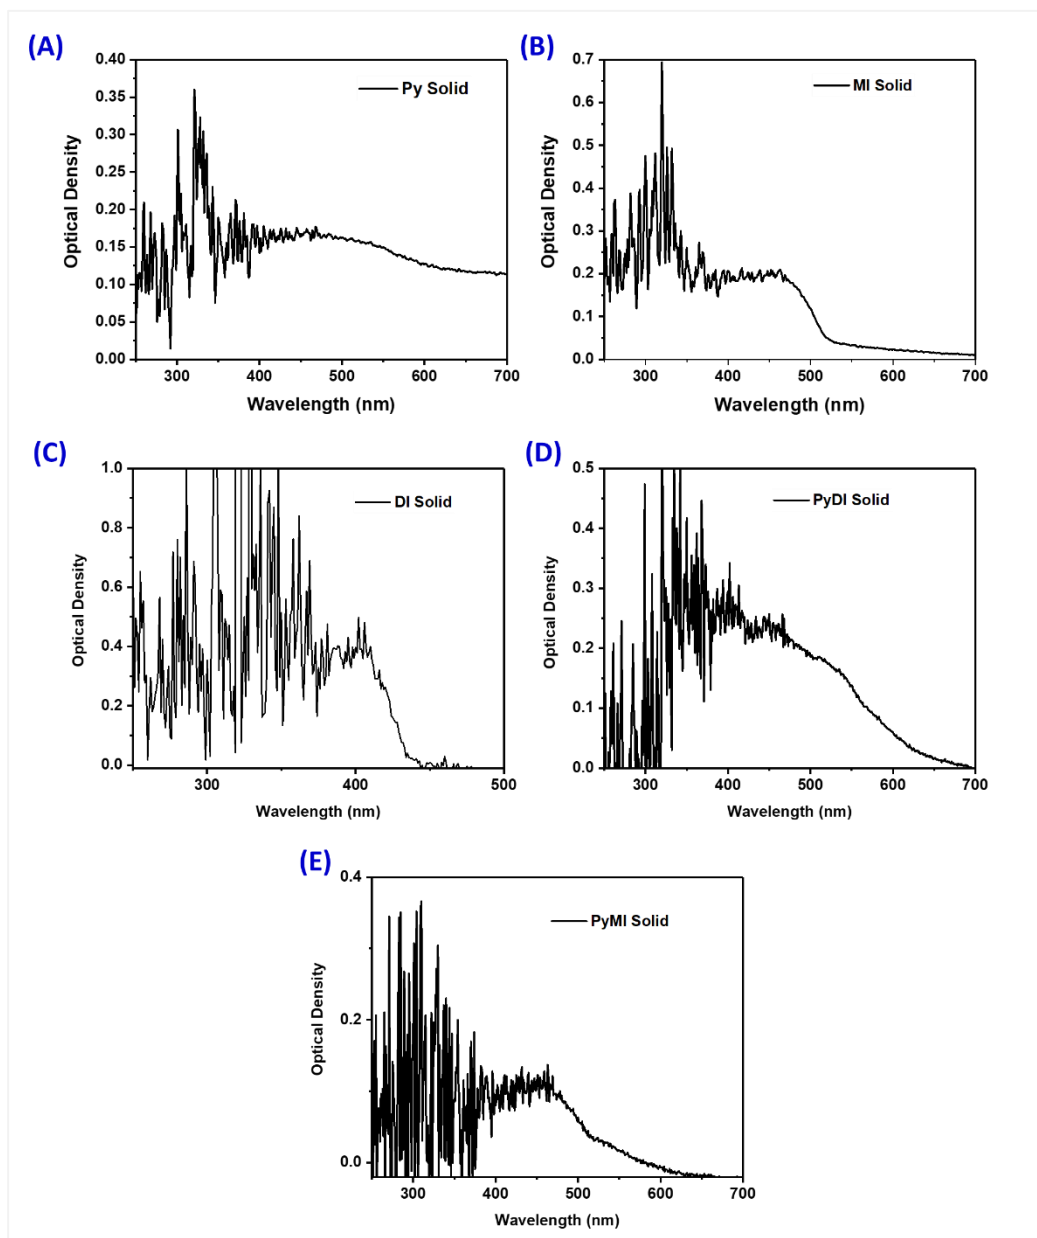

Figure S9: Solid state absorption spectra of A) Py B) MI C) DI D) Py+DI & E) Py+MI respectively.

## S10: Gelation Methodology

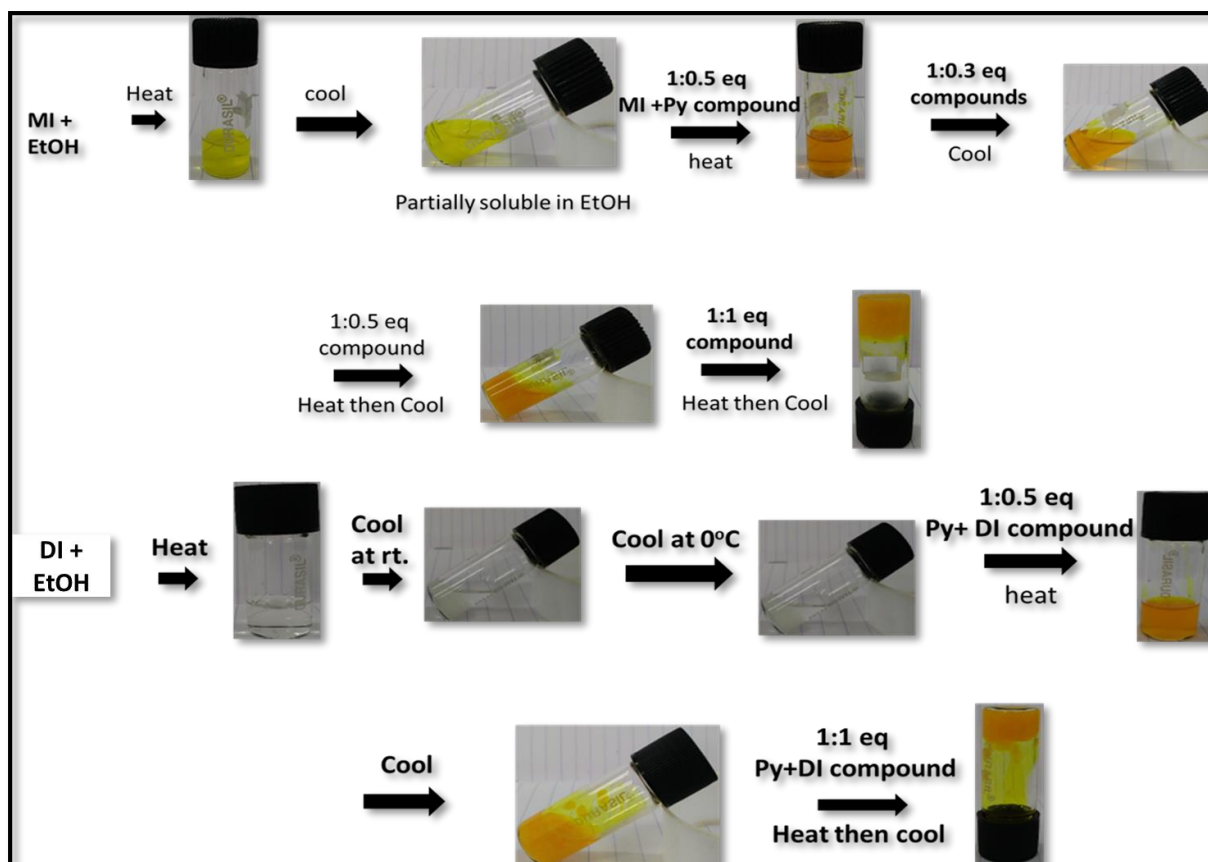

Figure S10: Gelation methodology; for Py along with DI and MI in different molar ratios in ethanol.

## S11: Rheology Data

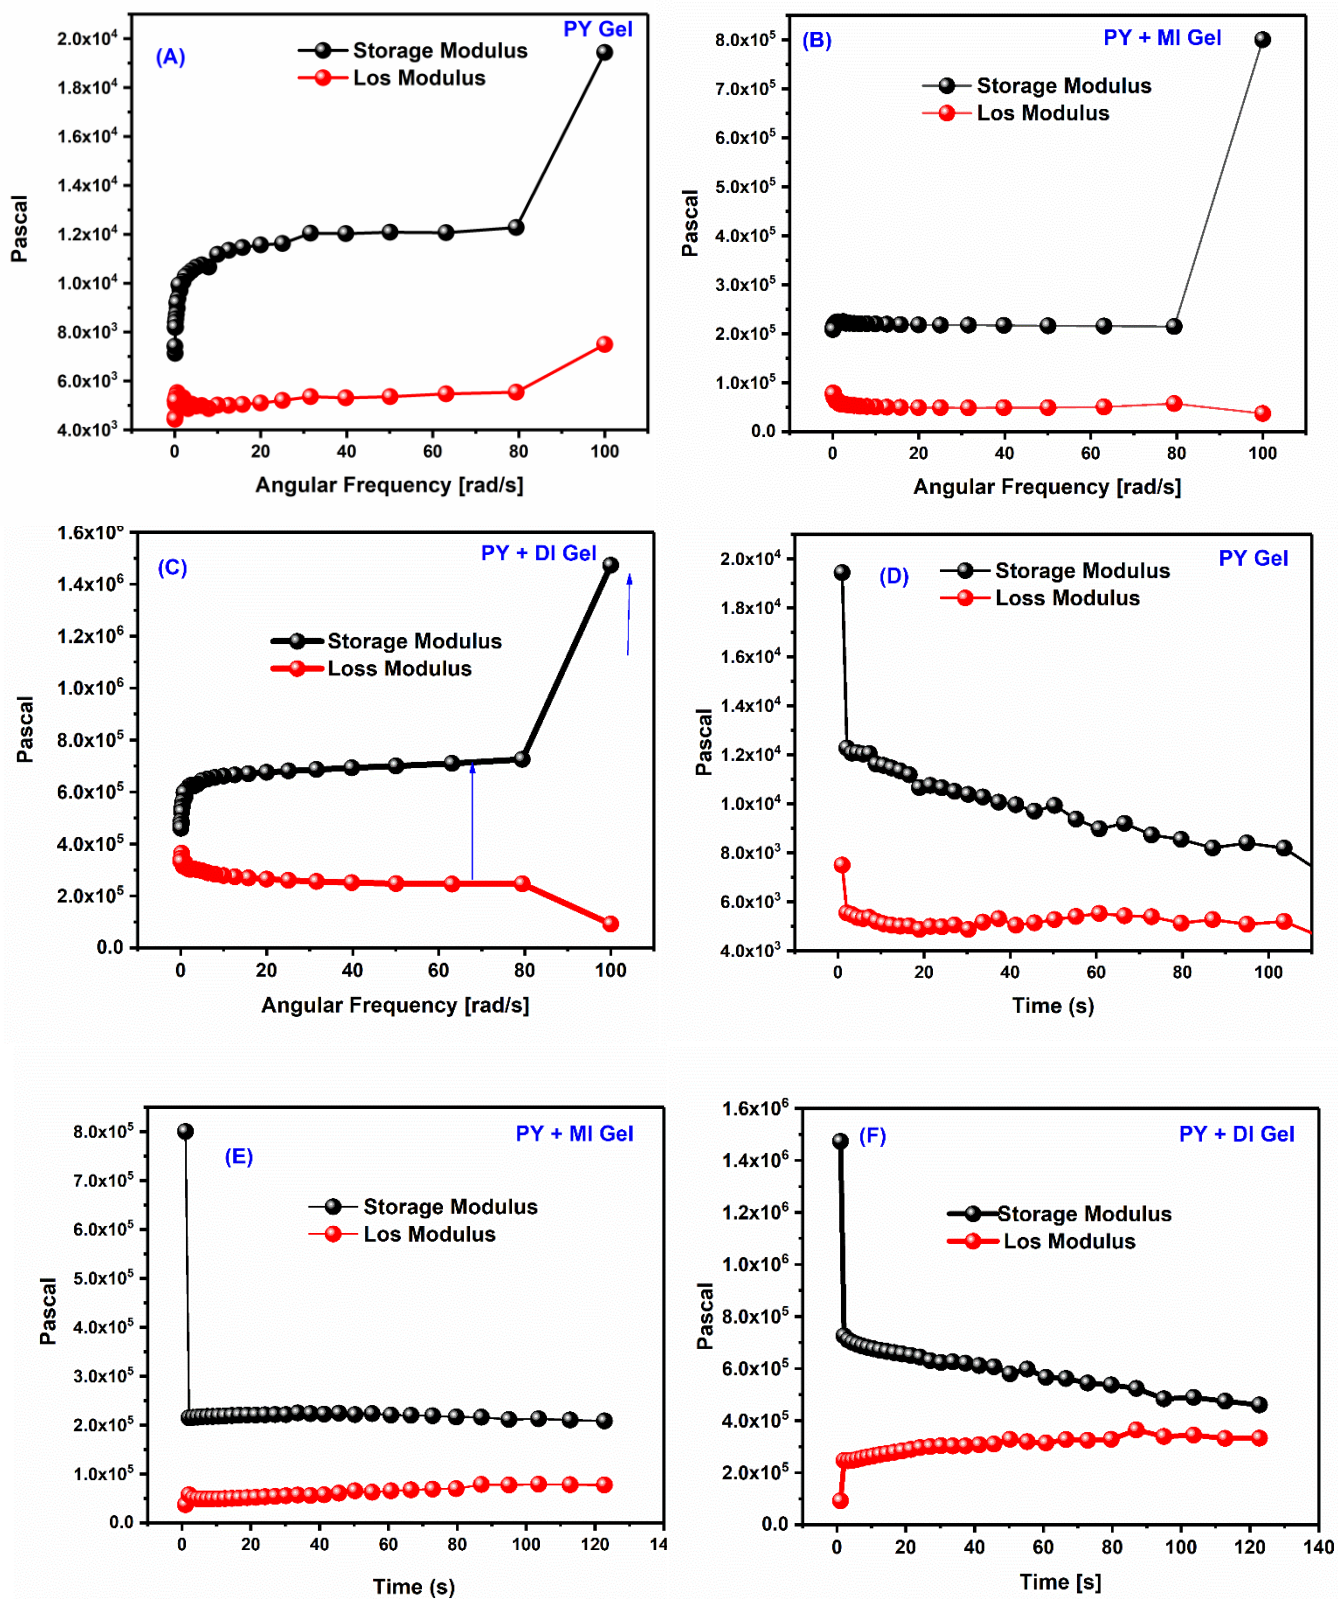

Figure S11 : A), B) & C) Angular Sweep measurements of Py, Py+MI, and Py+DI, respectively. D), E) & F) Time sweep measurements of Py, Py+MI, and Py+DI, respectively.

## S12: Detailed Synthetic Procedures

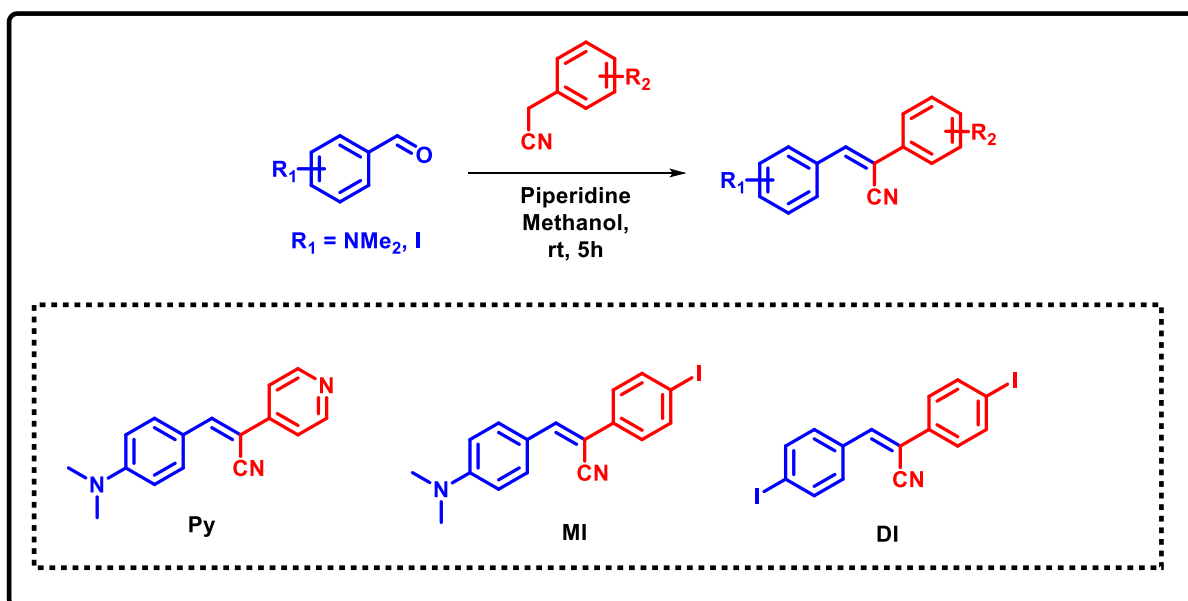

### General procedure for Knoevenagel condensation reaction for all three compounds:

The respective phenyl acetonitrile was charged with piperidine in methanol and allowed to stir for 15 min, followed by the addition of respective benzaldehyde for 5h at room temperature to yield the desired  $\alpha$ -cyanostilbenes in good yields (Py = 81%, Mi = 90% and DI = 91%). The spectral characterization and spectral copies are given below.

### S13: Characterization data $^1\text{H}$ , $^{13}\text{C}$ , Mass Spectra

#### Compound Py:

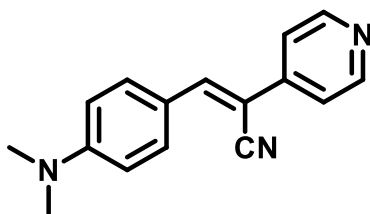

$^1\text{H}$  NMR (500 MHz,  $\text{CDCl}_3$ )  $\delta$  8.52 (dd,  $J = 4.6, 1.6$  Hz, 2H), 7.82 (d,  $J = 8.9$  Hz, 2H), 7.49 (s, 1H), 7.42 (dd,  $J = 4.6, 1.6$  Hz, 2H), 6.62 (t,  $J = 6.0$  Hz, 2H), 3.00 (s, 6H).

$^{13}\text{C}$  NMR (126 MHz,  $\text{CDCl}_3$ )  $\delta$  151.36, 149.25, 143.94, 142.04, 131.22, 119.53, 118.26, 110.54, 99.95, 76.30, 76.05, 75.79, 38.97. Mass-  $[\text{M}+\text{H}]$  Observed: 250.1332

#### Compound MI:

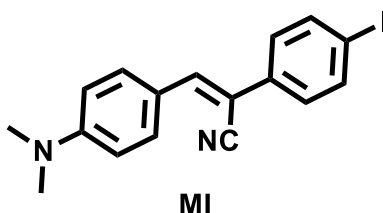

$^1\text{H}$  NMR (500 MHz,  $\text{CDCl}_3$ )  $\delta$  7.75 (d,  $J = 9.0$  Hz, 2H), 7.61 (d,  $J = 8.4$  Hz, 2H), 7.29 – 7.22 (m, 3H), 6.60 (d,  $J = 9.0$  Hz, 2H), 2.96 (s, 6H).

$^{13}\text{C}$  NMR (126 MHz,  $\text{CDCl}_3$ )  $\delta$  150.77, 141.74, 136.84, 134.15, 130.44, 126.00, 120.16, 118.04, 110.53, 102.05, 92.19, 76.28, 76.03, 75.77, 38.99. Mass –  $[\text{M}+\text{H}]$  observed – 375.0342

#### Compound DI:

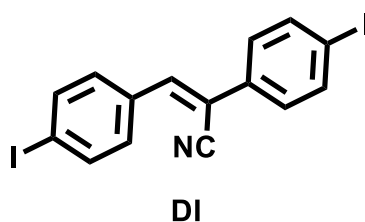

$^1\text{H}$  NMR (500 MHz,  $\text{CDCl}_3$ )  $\delta$  7.69 (dd,  $J = 15.1, 8.4$  Hz, 4H), 7.50 (d,  $J = 8.3$  Hz, 2H), 7.34 (s, 1H), 7.29 (d,  $J = 8.5$  Hz, 2H).

$^{13}\text{C}$  NMR (126 MHz,  $\text{CDCl}_3$ )  $\delta$  140.08, 137.21, 137.19, 132.58, 131.72, 129.61, 126.48, 116.23, 110.37, 96.42, 94.46, 76.28, 76.03, 75.78. Mass-  $[\text{M}+\text{H}]$  Observed: 457.00

# S14: Spectral copies

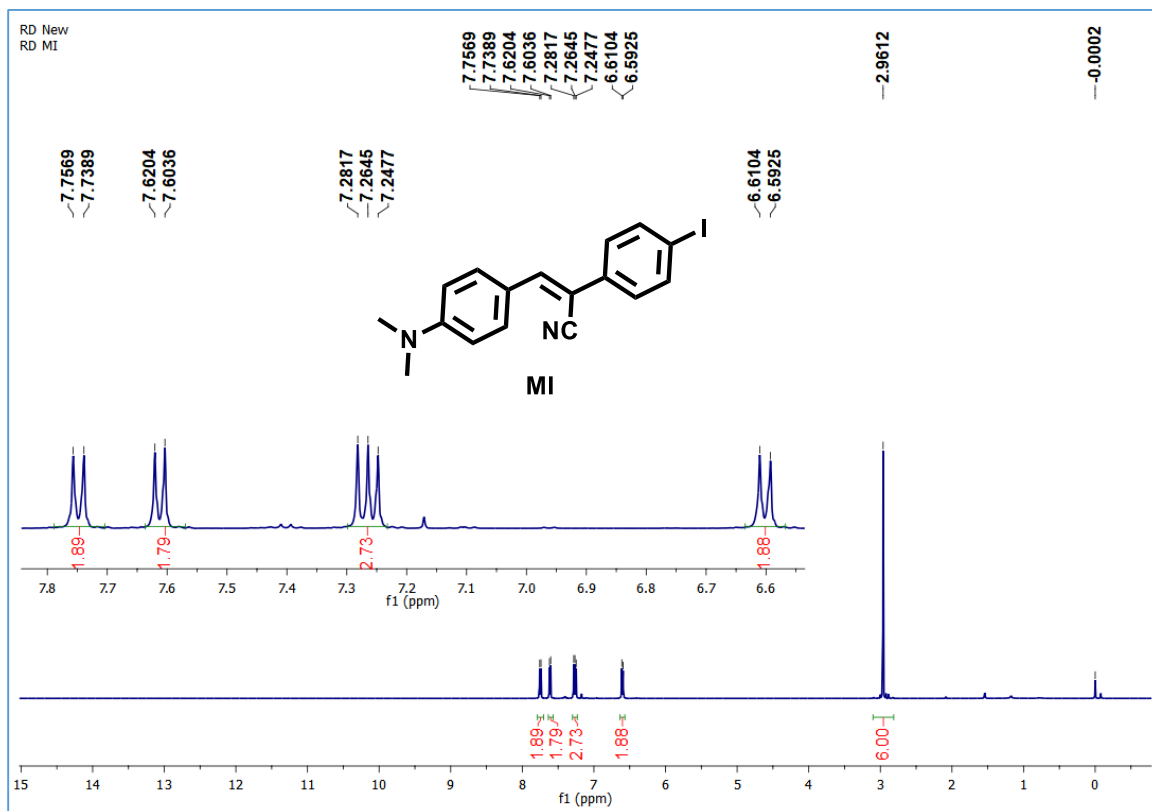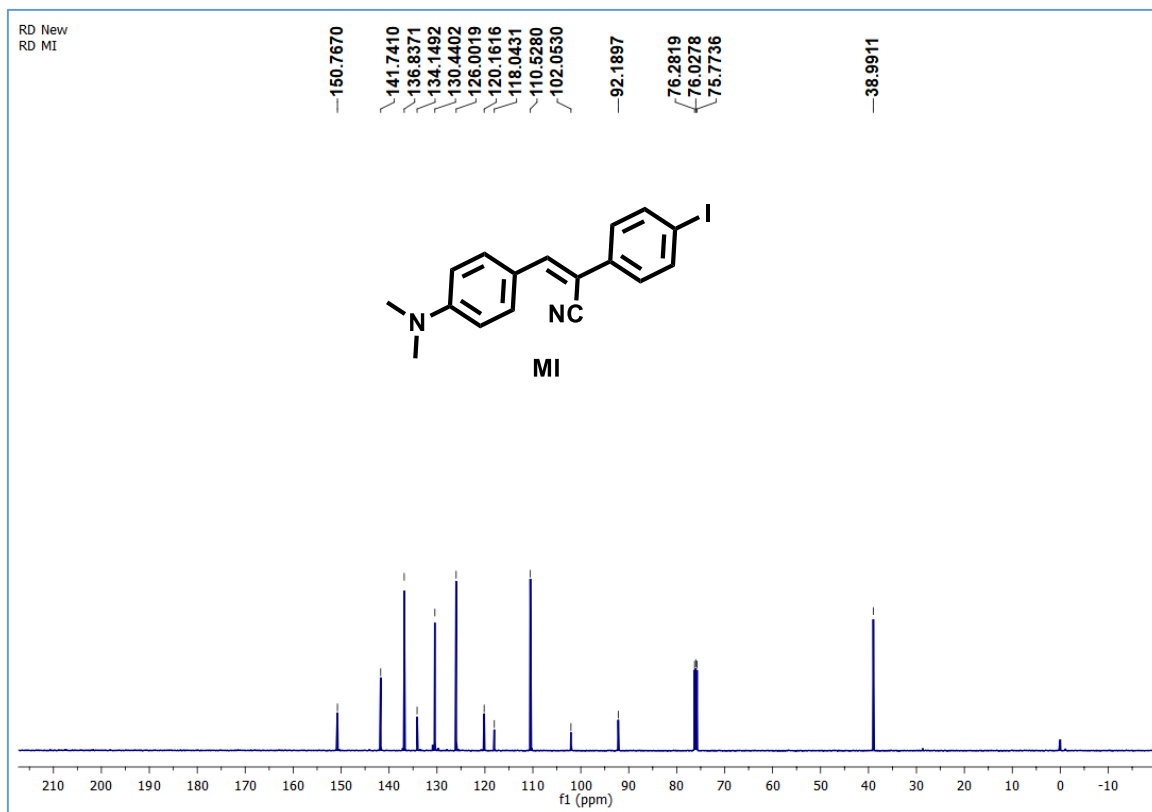

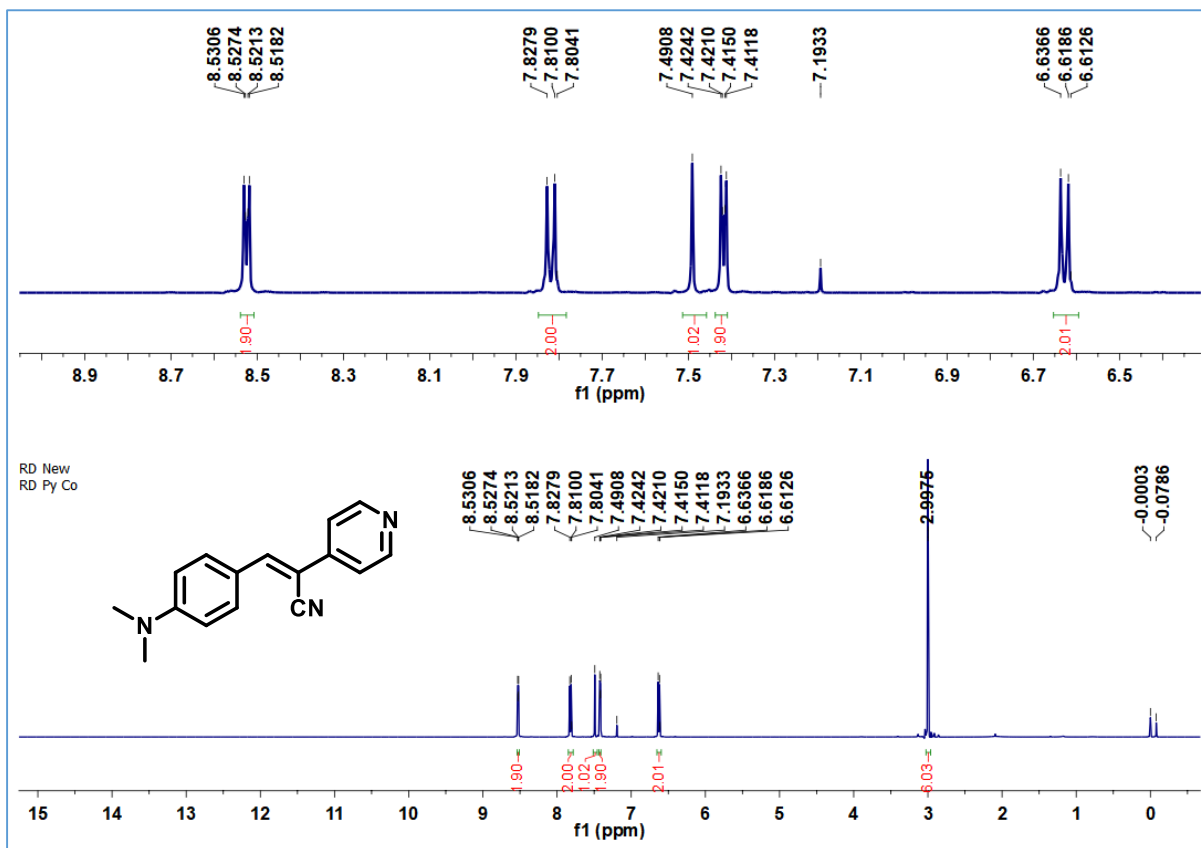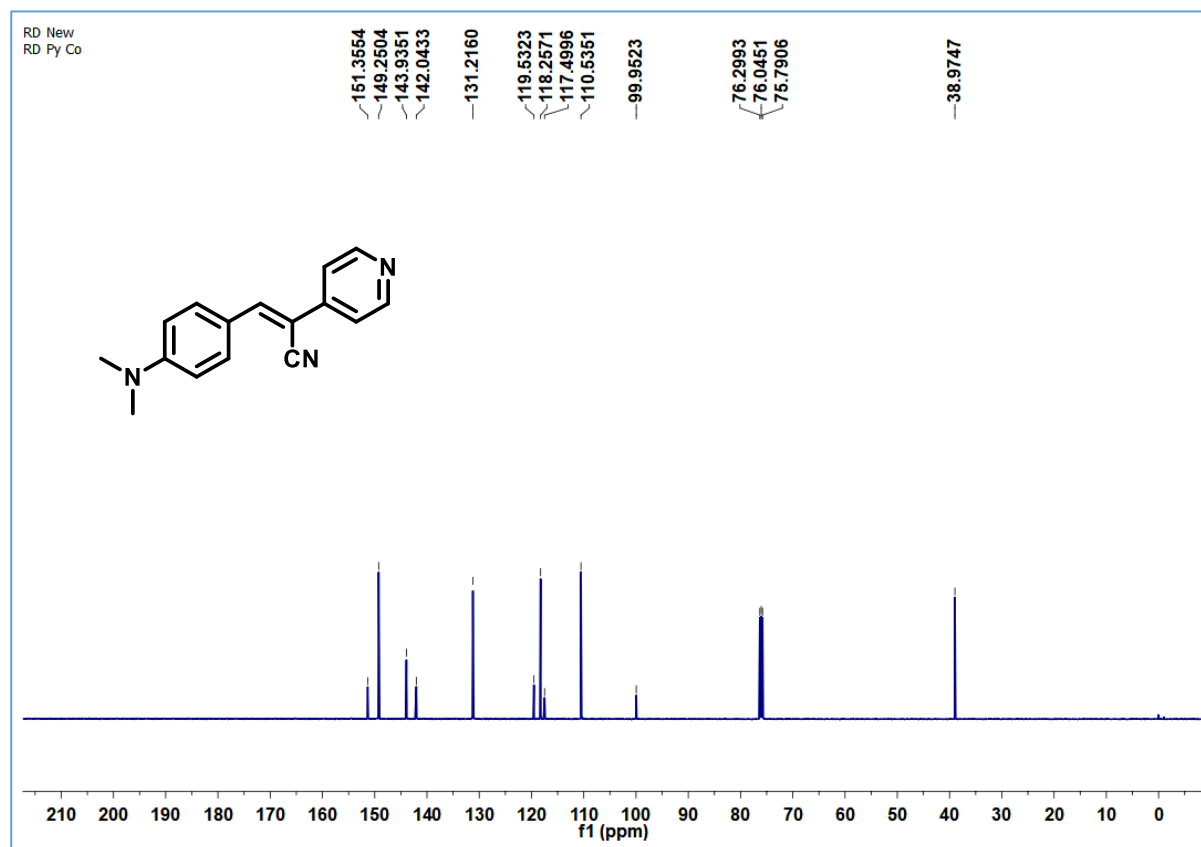



RD New  
RD DI Co

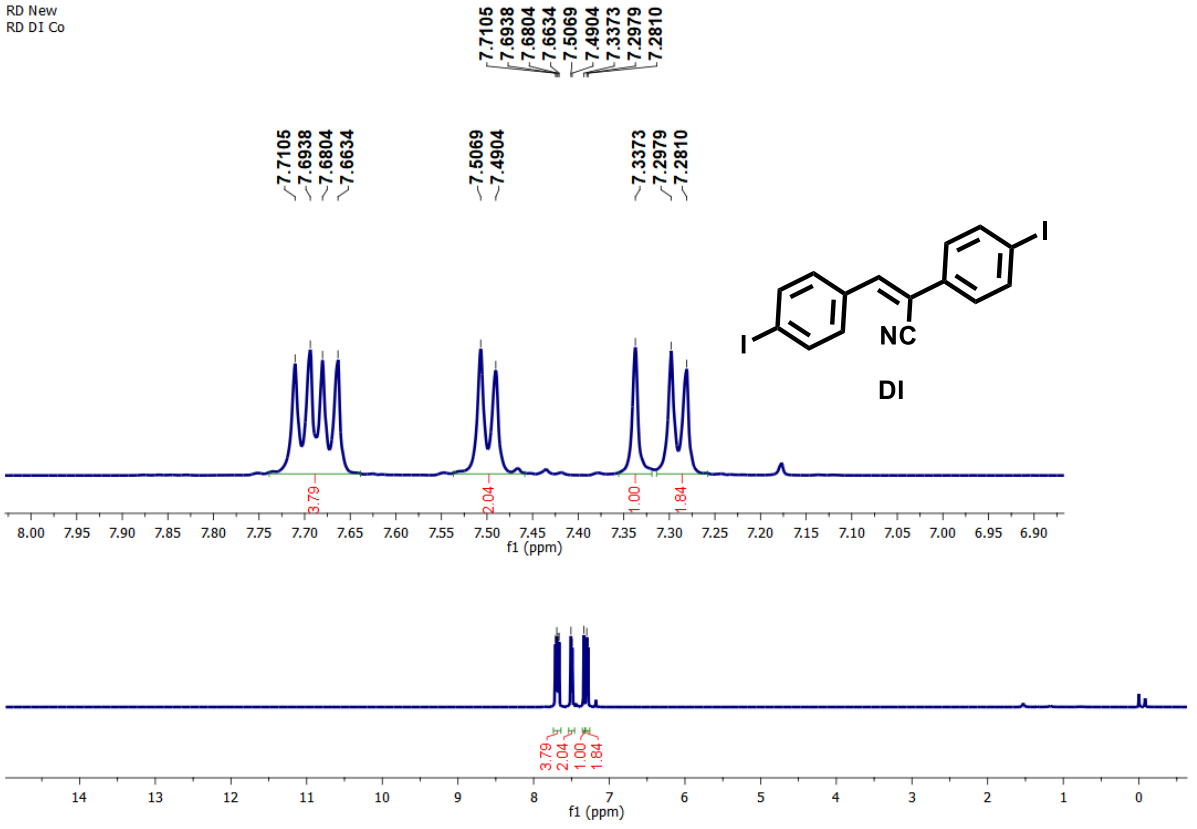

RD New  
RD DI Co

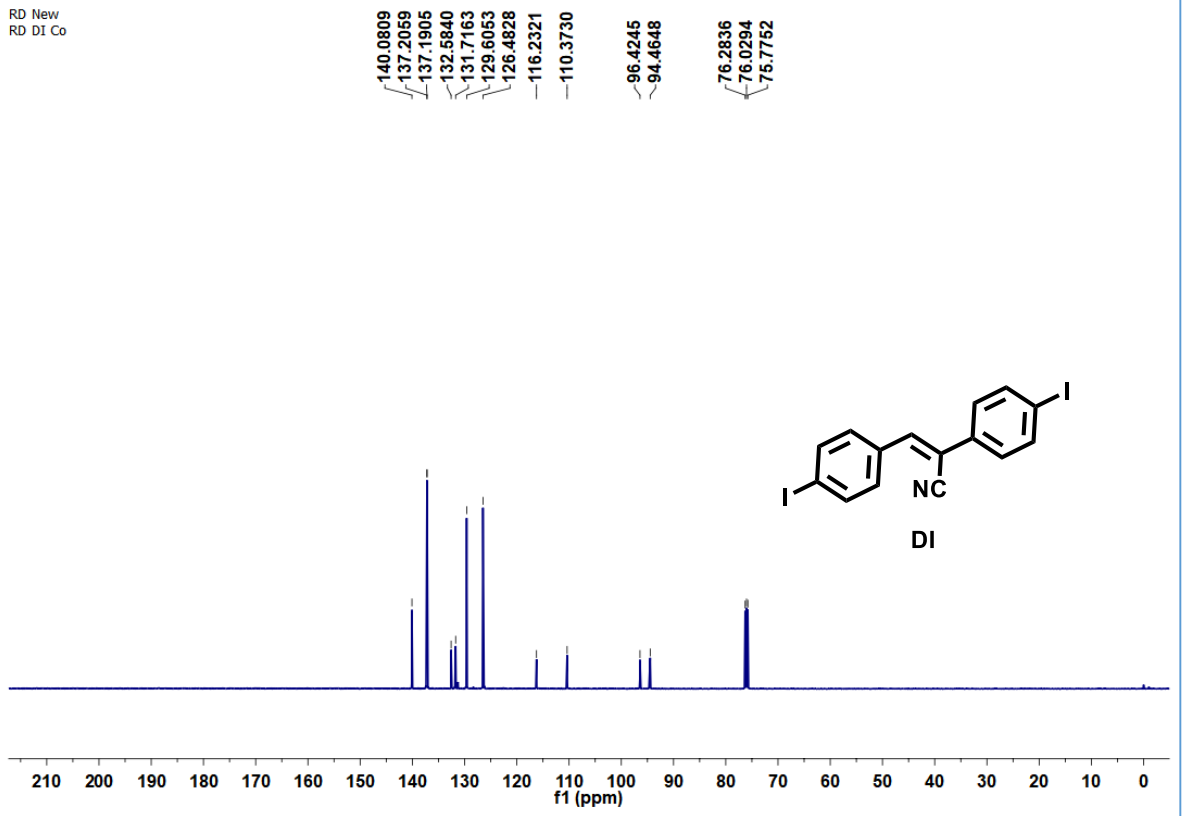

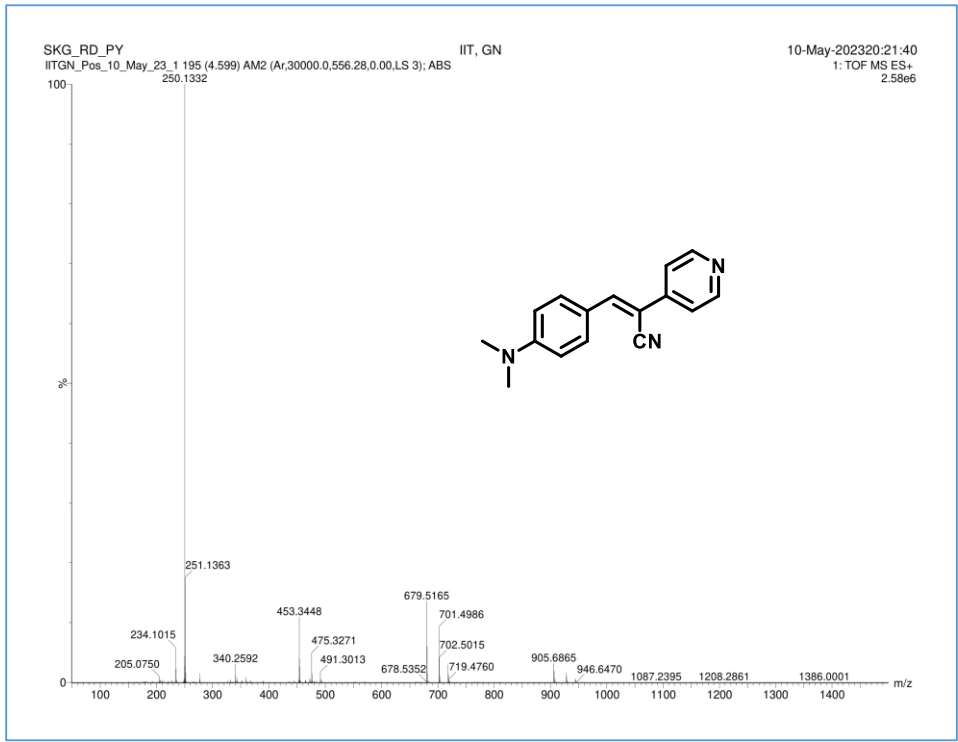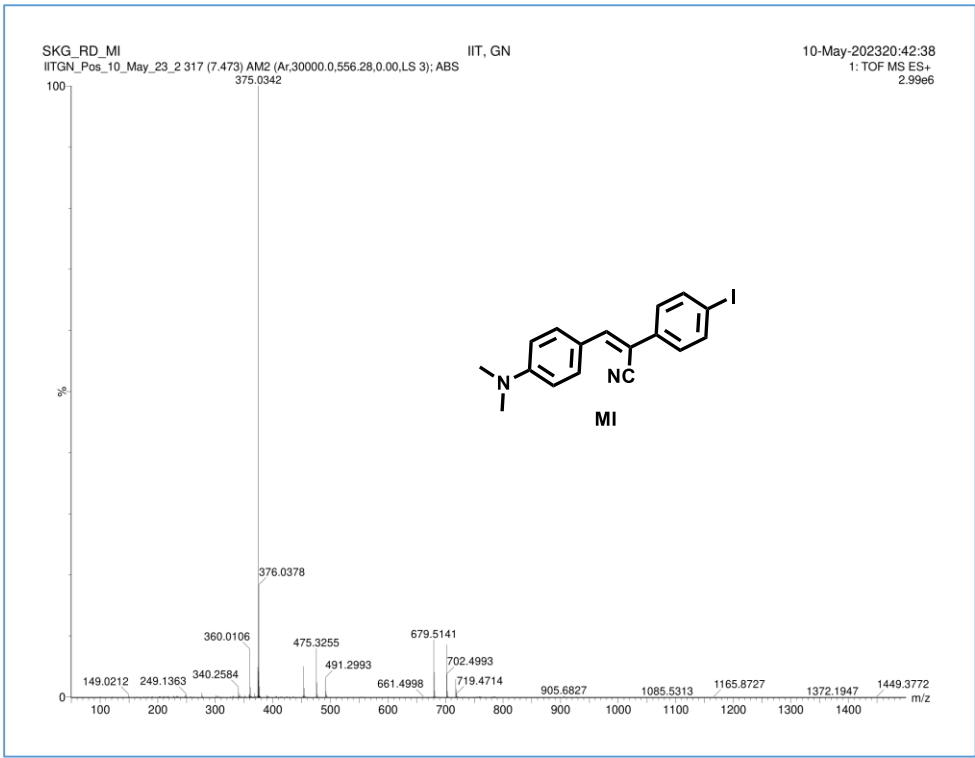

GC\_DI\_20220630171815 #2925 RT: 16.41 AV: 1 NL: 1.98E3  
T: ITMS + p ESI Full ms [100.00-2000.00]

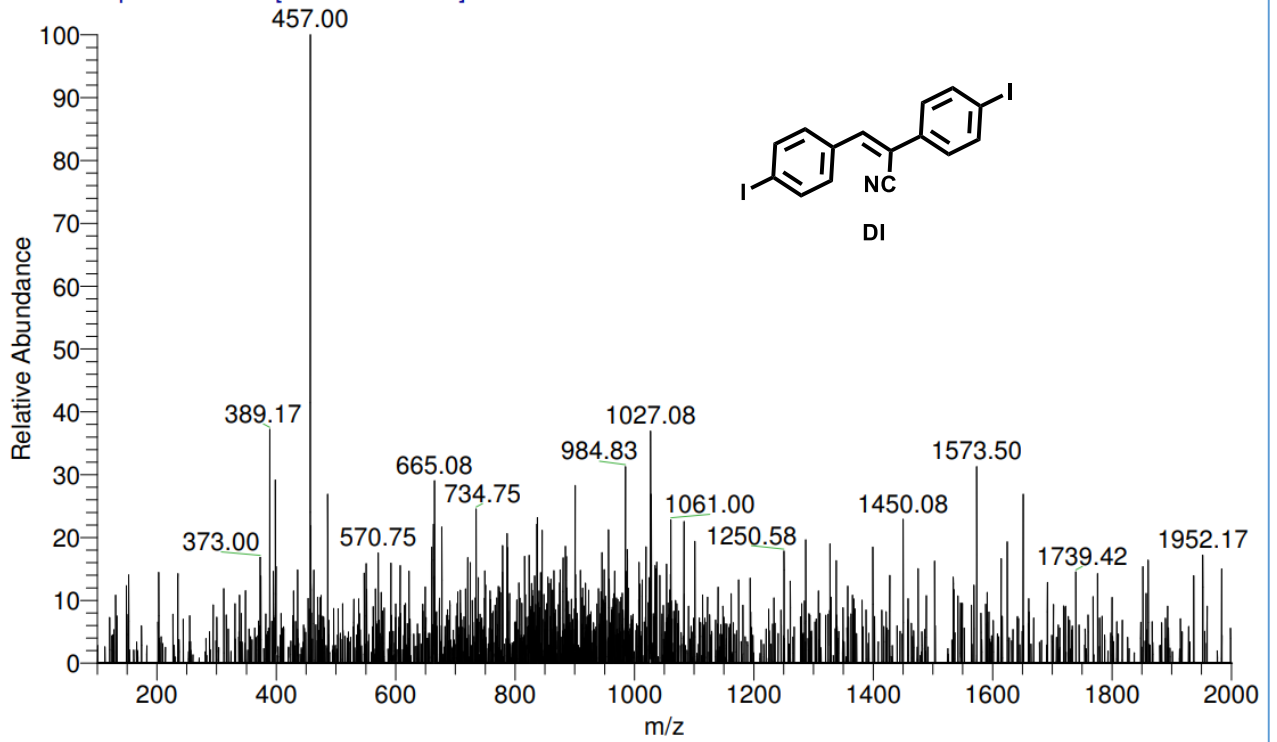

Supplement: d3nj00333g1.pdf [file d3nj00333g1.pdf]
